# Supplementary material
Source: PubMed Central journal article supplement (PMC3354687)
Supplement: NIHMS373636-supplement-supplement_1.pdf [file NIHMS373636-supplement-supplement_1.pdf]

# S1

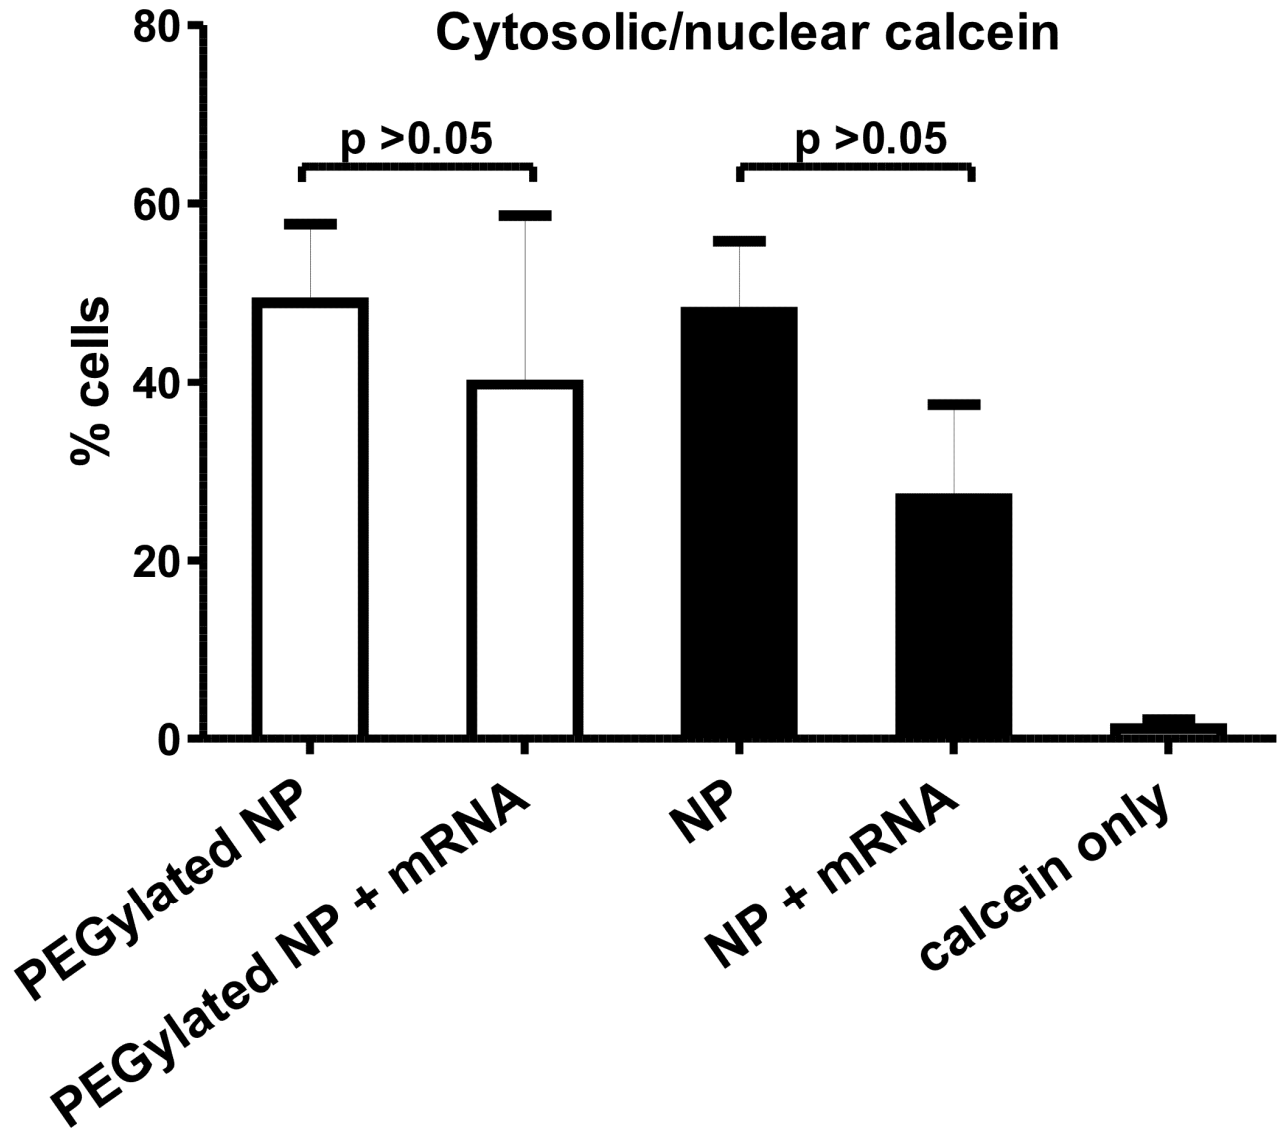

**Figure S1.** Average percentage of cells exhibiting cytosolic/nuclear calcein distribution after 1 h incubation with mRNA-loaded vs. bare particles (0.2  $\mu$ g mRNA adsorbed to 15  $\mu$ g NPs added in 200  $\mu$ l cell culture medium). Shown are the mean  $\pm$  SD from triplicate samples.
